# Supplementary material for: Molecular engineering of (E)-1,2-bis(3-cyanothiophene-2-yl)ethene-based polymeric semiconductors for unipolar n-channel field-effect transistors
Source: Royal Society of Chemistry journal article supplement (doi:10.1039/d0py01399d), 2020-01-01
Supplement: d0py01399d1.pdf [file d0py01399d1.pdf]

## Supporting Information

### Molecular Engineering of (*E*)-1,2-bis(3-cyanothiophene-2-yl)ethene-based Polymeric Semiconductors for Unipolar n-Channel Field-Effect Transistors

Congyuan Wei,<sup>a,b†</sup> Zhonghai Tang,<sup>a,c†</sup> Weifeng Zhang,<sup>a</sup> Jianyao Huang,<sup>a</sup> Yankai Zhou,<sup>a,b</sup> Liping Wang,<sup>\*c</sup> and Gui Yu<sup>\*a,b</sup>

<sup>a</sup> *Beijing National Laboratory for Molecular Sciences, CAS Research/Education Center for Excellence in Molecular Sciences, Institute of Chemistry, Chinese Academy of Sciences, Beijing 100190, P. R. China*

<sup>b</sup> *School of Chemical Sciences, University of Chinese Academy of Sciences, Beijing 100049, P. R. China*

<sup>c</sup> *School of Material Science and Engineering, University of Science and Technology Beijing, Beijing 100083, P. R. China*

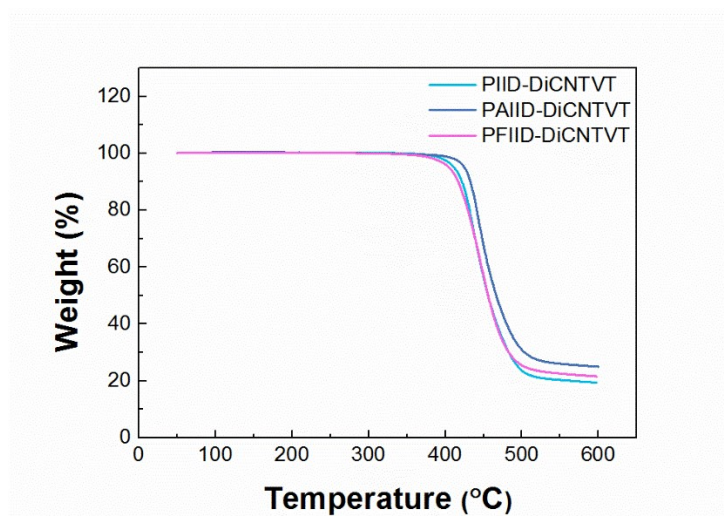

**Figure S1.** Thermogravimetric traces of PIID-DiCNTVT, PAIID-DiCNTVT, and PFIID-DiCNTVT.

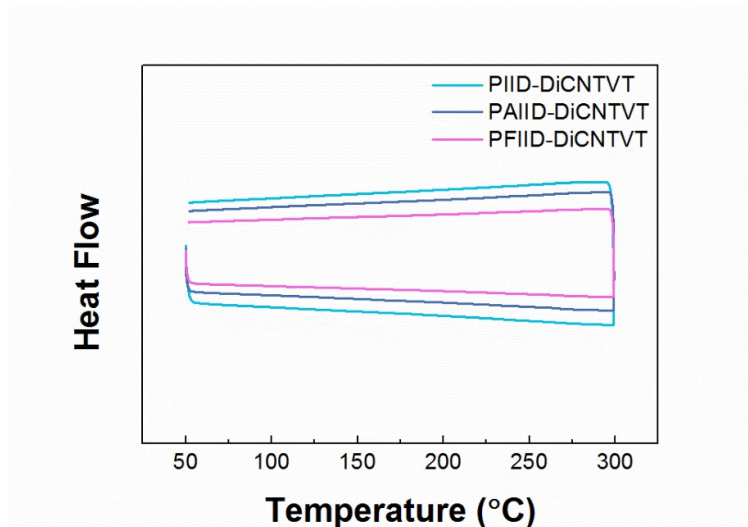

**Figure S2.** Differential scanning calorimetry analyses of **PIID-DiCNTVT**, **PAIID-DiCNTVT**, and **PFIID-DiCNTVT**.

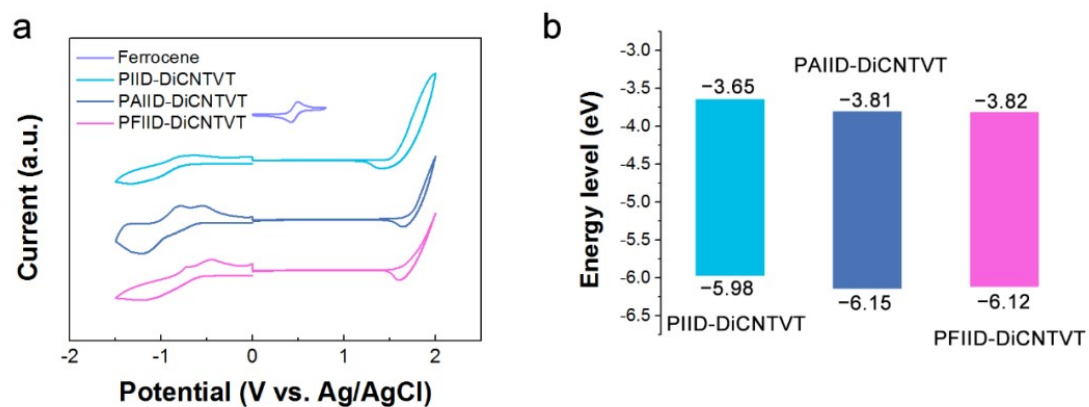

**Figure S3.** Cyclic voltammetry curves and schematic diagram of energy levels of **PIID-DiCNTVT**, **PAIID-DiCNTVT**, and **PFIID-DiCNTVT**.

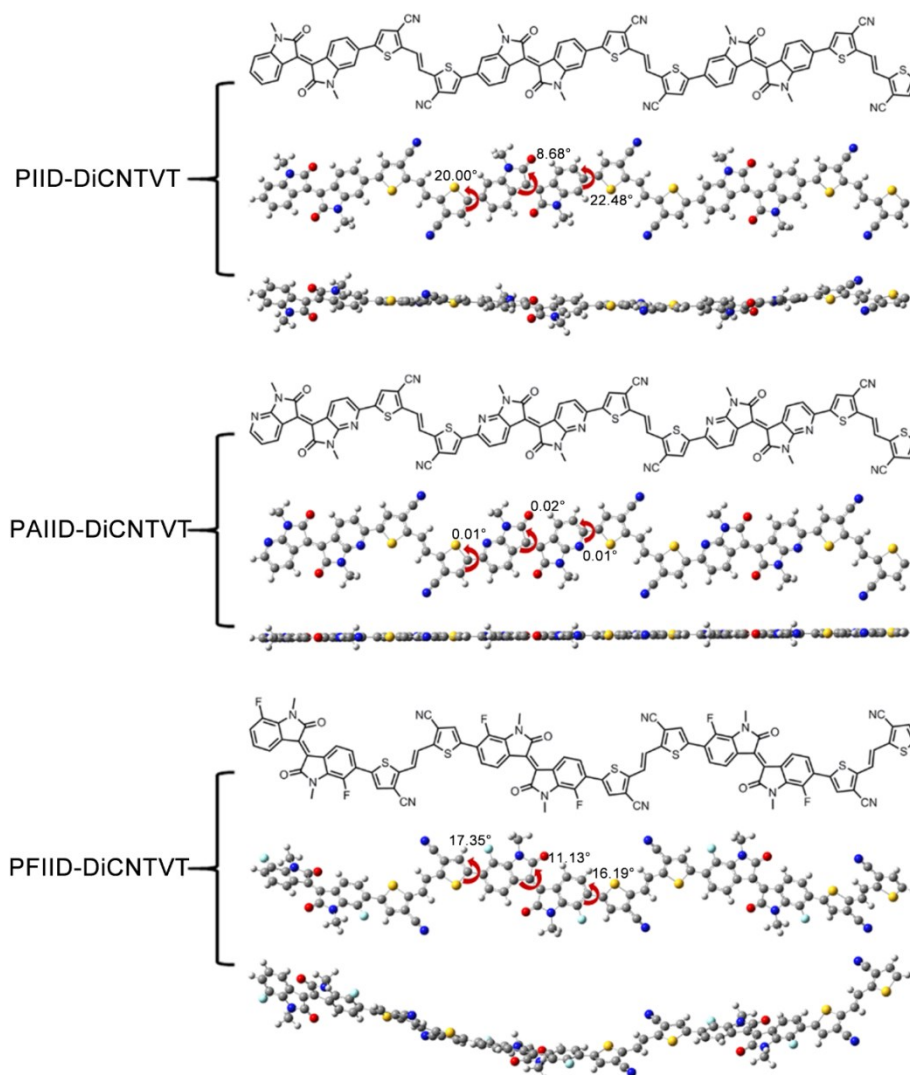

**Figure S4.** Chemical structures of trimers (up), the front view (middle), and the side view (bottom) of the simulated trimers of **PIID-DiCNTVT**, **PAIID-DiCNTVT**, and **PFIID-DiCNTVT**.

**Table S1.** Calculated frontier orbital energy levels of trimers of **PIID-DiCNTVT**, **PAIID-DiCNTVT**, and **PFIID-DiCNTVT**

| polymer              | HOMO (eV) | LUMO (eV) |
|----------------------|-----------|-----------|
| <b>PIID-DiCNTVT</b>  | -5.50     | -3.44     |
| <b>PAIID-DiCNTVT</b> | -5.60     | -3.62     |
| <b>PFIID-DiCNTVT</b> | -5.62     | -3.62     |

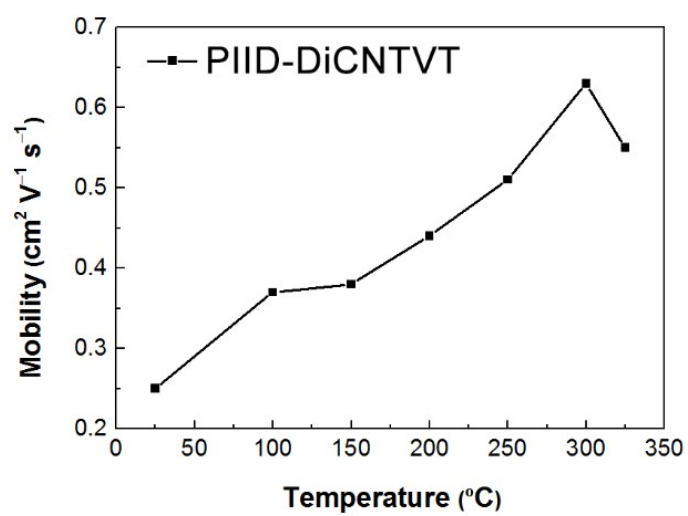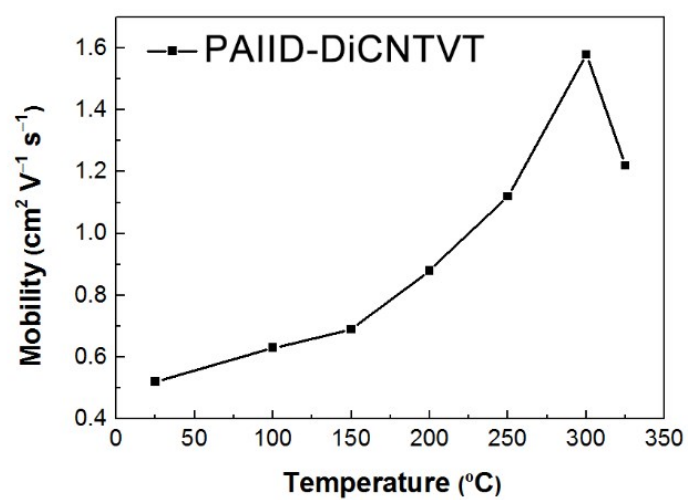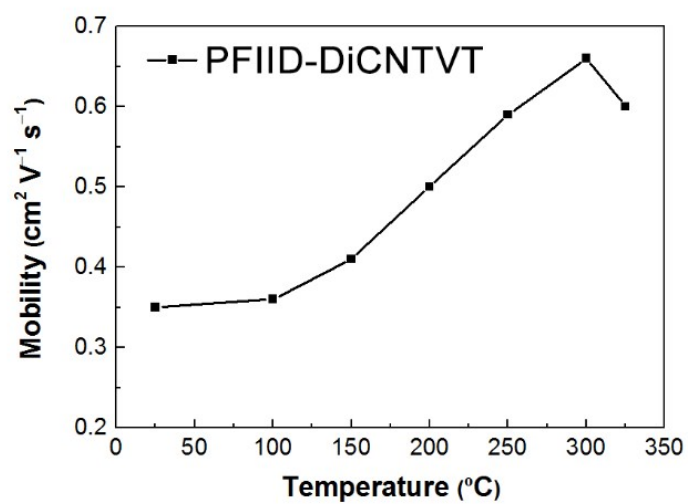

**Figure S5.** Temperature-dependent mobilities of transistors based on **PIID-DiCNTVT**, **PAIID-DiCNTVT**, and **PFIID-DiCNTVT**.

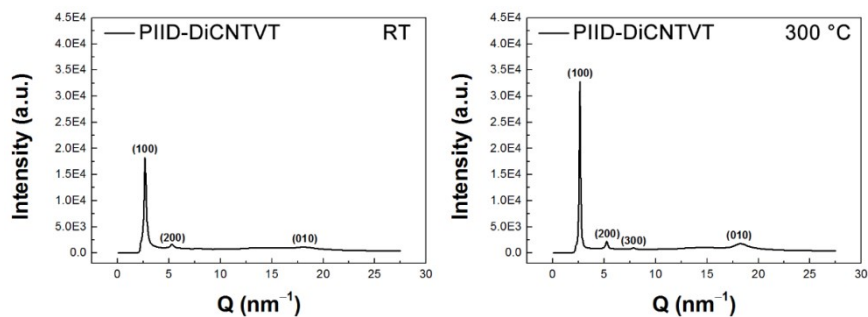

**Figure S6.** 1-D XRD profiles in out-of-plane direction of the **PIID-DiCNTVT** thin film before and after thermal annealing treatment.

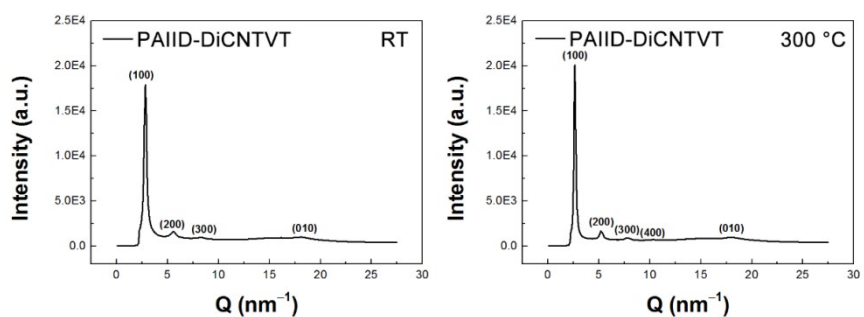

**Figure S7.** 1-D XRD profiles in out-of-plane direction of the **PAIID-DiCNTVT** thin film before and after thermal annealing treatment.

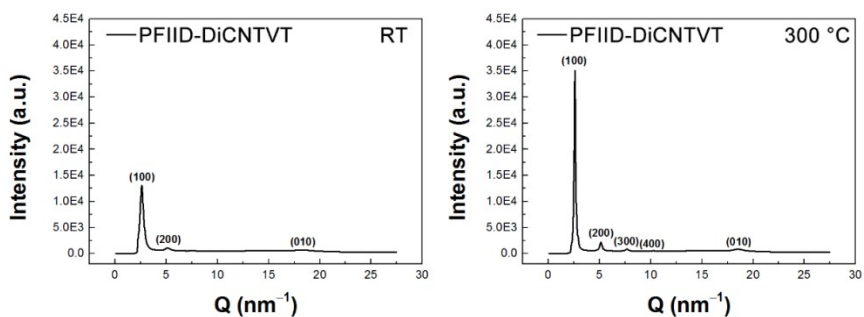

**Figure S8.** 1-D XRD profiles in out-of-plane direction of the **PFIID-DiCNTVT** thin film before and after thermal annealing treatment.

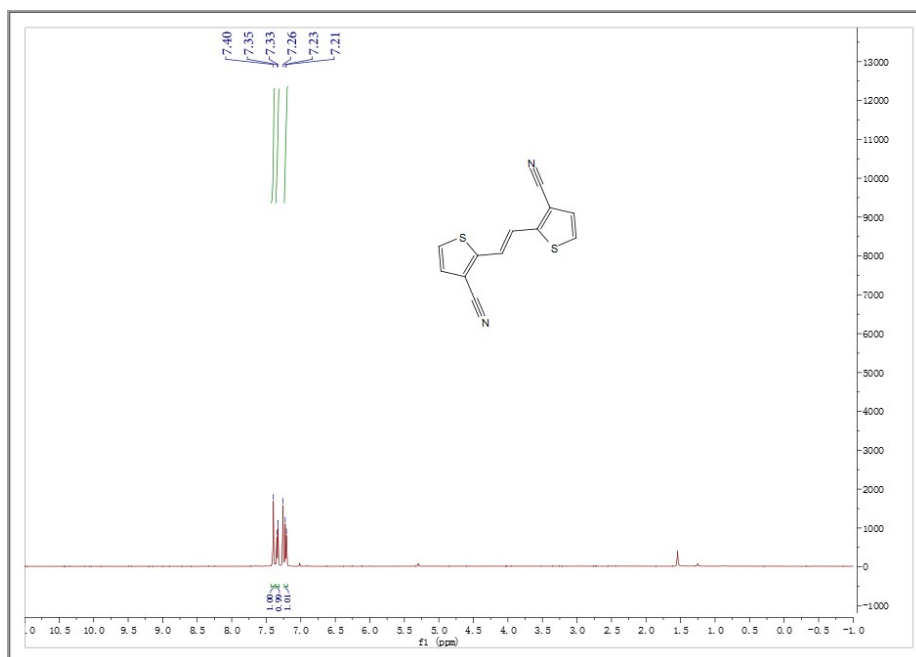

**Figure S9.** <sup>1</sup>H NMR spectrum of the compound DiCNTVT.

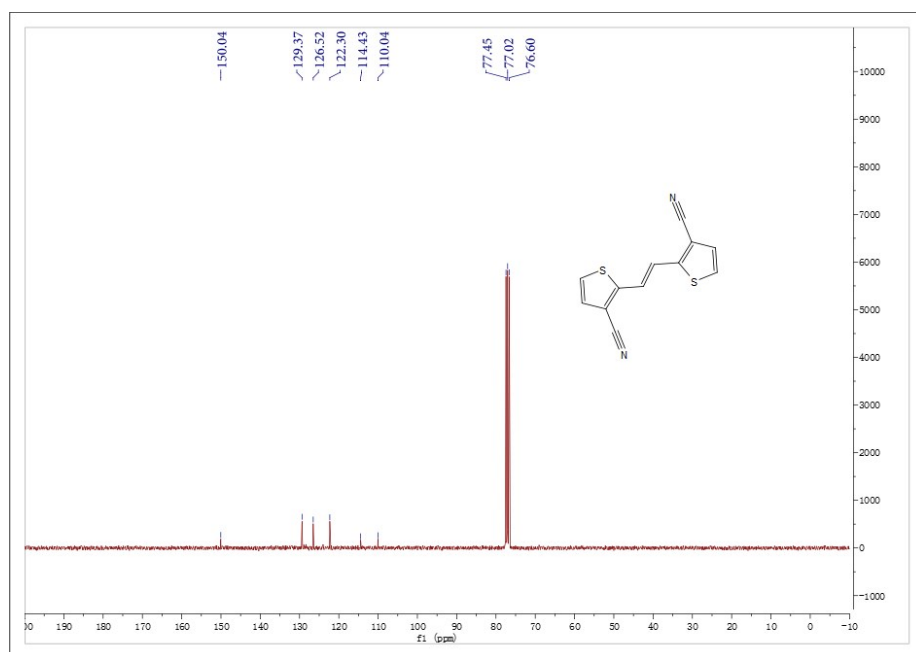

**Figure S10.** <sup>13</sup>C NMR spectrum of the compound DiCNTVT.

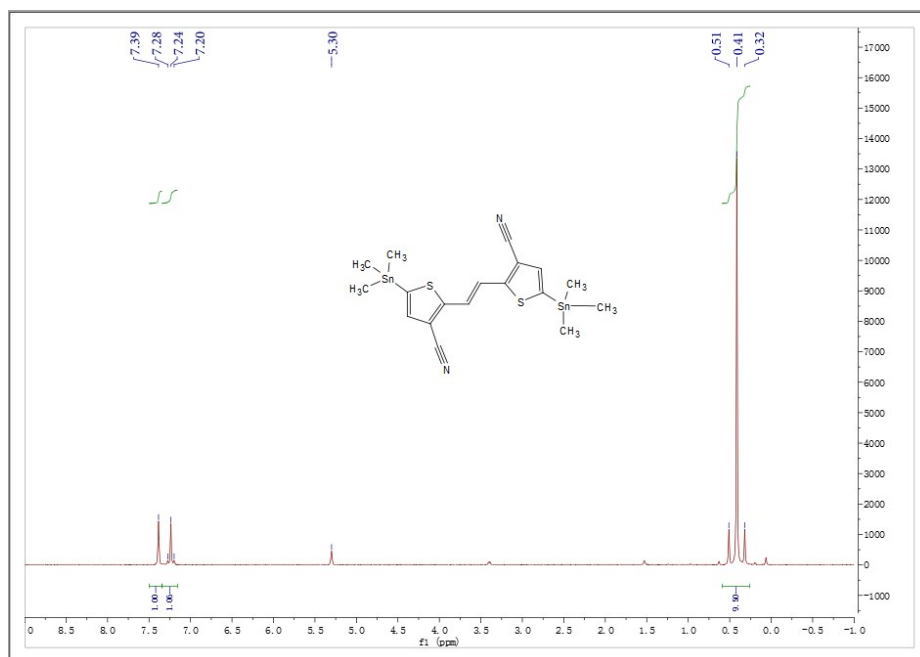

**Figure S11.** <sup>1</sup>H NMR spectrum of compound DiCNTVT-Sn.

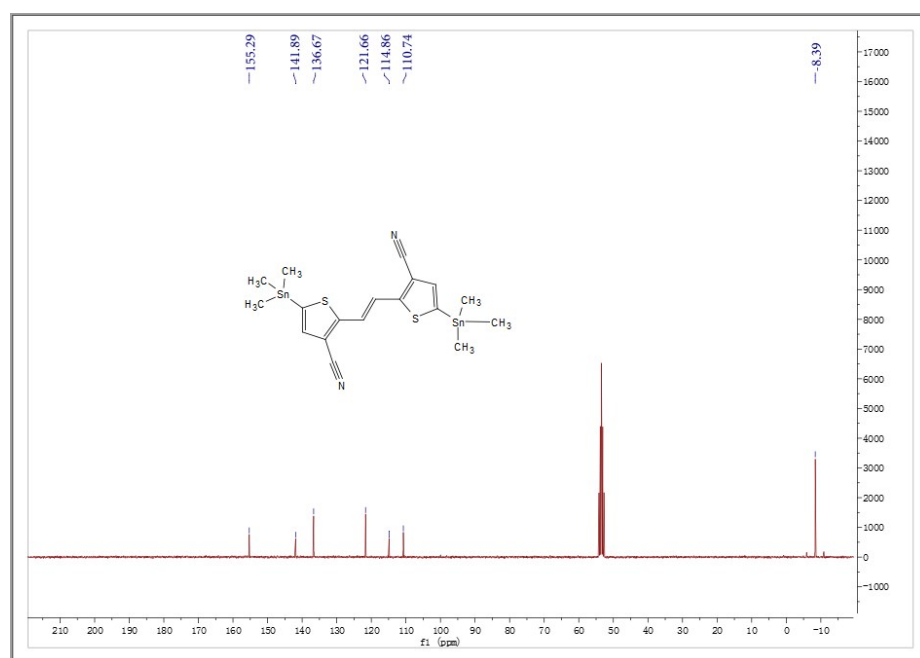

**Figure S12.** <sup>13</sup>C NMR spectrum of compound DiCNTVT-Sn.

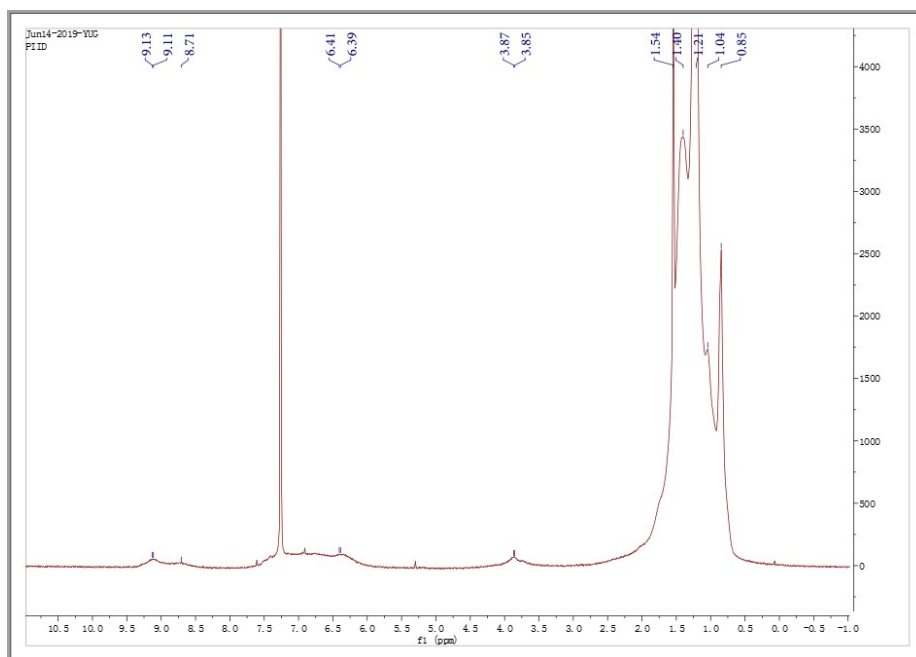

Figure S13.  $^1\text{H}$  NMR spectrum of polymer PIID-DiCNTVT.

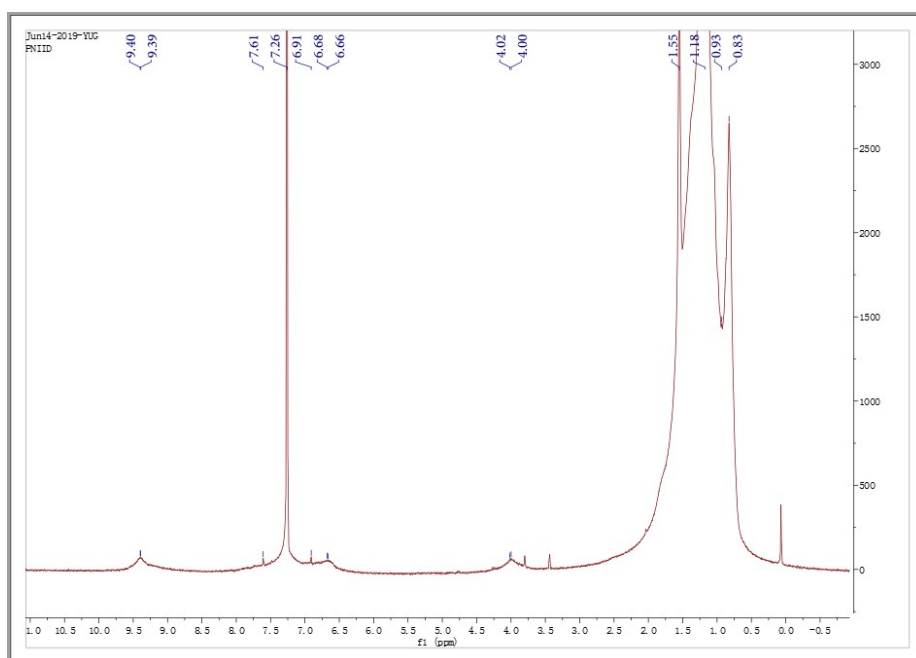

Figure S14.  $^1\text{H}$  NMR spectrum of polymer PAIID-DiCNTVT.



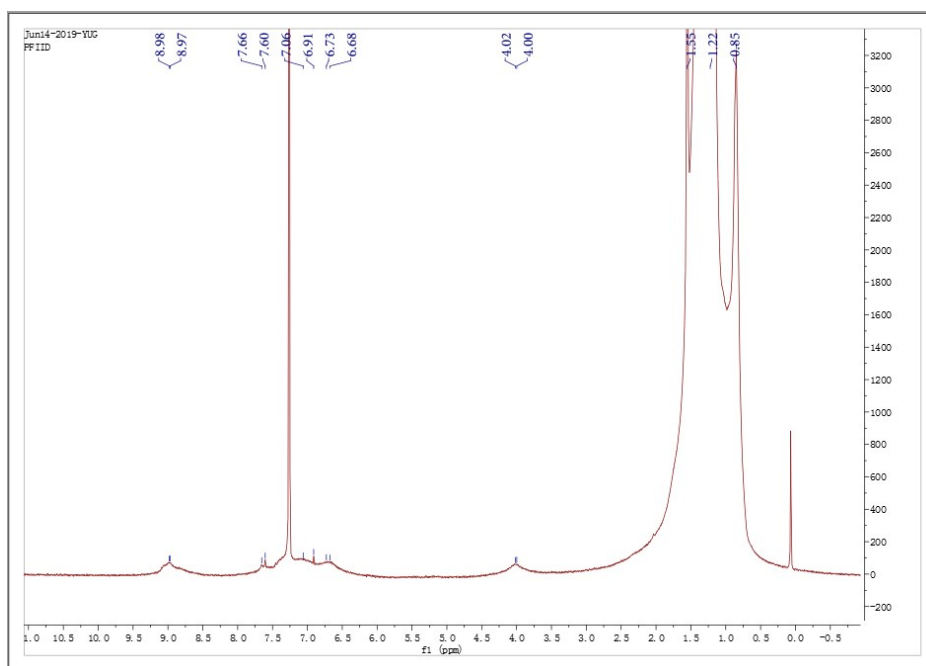

**Figure S15.**  $^1\text{H}$  NMR spectrum of polymer **PFIID-DiCNTVT**.
